1 **Vegetative Cell and Spore Proteomes of**  
2 ***Clostridioides difficile* show finite differences and**  
3 **reveal potential protein markers.**

4

5 *Wishwas R. Abhyankar*<sup>1,2</sup>, *Linli Zheng*<sup>1,2</sup>, *Stanley Brul*<sup>1+\*</sup>, *Chris G. de Koster*<sup>2+</sup>, *Leo J. de Koning*<sup>2</sup>

6

7 <sup>1</sup>Department of Molecular Biology and Microbial Food Safety, University of Amsterdam,  
8 Amsterdam, the Netherlands;

9 <sup>2</sup>Department of Mass Spectrometry of Bio-Macromolecules, University of Amsterdam,  
10 Amsterdam, the Netherlands.

11

12 \* Corresponding author E-mail: [s.brul@uva.nl](mailto:s.brul@uva.nl)

13 <sup>+</sup>These authors contributed equally to this work.

14

15 **KEYWORDS:** *Clostridioides difficile*, vegetative cells, endospores, proteomes, quantitative  
16 proteomics, protein markers

17 **Abstract**

18 *Clostridioides difficile*-associated infection (CDI) is a health-care-associated infection mainly  
19 transmitted via highly resistant endospores from one person to the other. *In vivo*, the spores need  
20 to germinate in to cells prior to establishing an infection. Bile acids and glycine, both available in  
21 sufficient amounts inside the human host intestinal tract, serve as efficient germinants for the  
22 spores. It is therefore, for better understanding of *Clostridioides difficile* virulence, crucial to  
23 study both the cell and spore states with respect to their genetic, metabolic and proteomic  
24 composition. In the present study, mass spectrometric relative protein quantification, based on  
25 the  $^{14}\text{N}/^{15}\text{N}$  peptide isotopic ratios, has led to quantification of over 700 proteins from combined  
26 spore and cell samples. The analysis has revealed that the proteome turnover between a  
27 vegetative cell and a spore for this organism is moderate. Additionally, specific cell and spore  
28 surface proteins, vegetative cell proteins CD1228, CD3301 and spore proteins CD2487, CD2434  
29 and CD0684 are identified as potential protein markers for *C. difficile* infection.

30

31

32

33

34

35

36

37

38

39

## 40 **Introduction**

41 *Clostridioides* (previously *Clostridium*) *difficile*, an anaerobic, gram-positive pathogen, is the  
42 causative agent of an infection (CDI) characterized by pseudomembranous colitis and  
43 nosocomial diarrhoea. An over-extensive use of antibiotics is implicated for the spread of CDI  
44 and high rates of asymptomatic colonization by *C. difficile* make its diagnosis challenging (1).  
45 This necessitates designing strategies and algorithms to optimize the diagnostic tools (2).  
46 Pathogenesis of CDI is manifested via its Rho-glycosylating toxins TcdA and TcdB (3).  
47 Moreover, in response to adverse conditions, *C. difficile* can form endospores - multi-layered,  
48 highly resistant cellular entities - that are the main transmissible forms (4) in *C. difficile*  
49 infections. The spores can germinate in the intestinal environment upon interaction with bile acid  
50 mediated by the CspC protease (5), subsequently manifesting the infection.

51 To date, substantial research has been done on *C. difficile* vegetative cells and spores to  
52 understand the survival mechanisms of this pathogen. However, research performed on spores  
53 has gained more importance, owing to their crucial role in survival of *C. difficile*. The number of  
54 spore-related genes identified in *Clostridia* is significantly smaller than that in *Bacilli* (6). Less  
55 than 25% of the spore coat proteins of *B. subtilis* have homologues in *C. difficile* and unlike in *B.*  
56 *subtilis*, in *C. difficile*, neither does the activation of  $\sigma^G$  rely on  $\sigma^E$  nor is it required for the  
57 production and  $\sigma^K$  activation (7-9). Furthermore, in *C. difficile* spores, cortex hydrolysis occurs  
58 before the release of  $\text{Ca}^{2+}$ -dipicolinic acid complex (10), whereas in *B. subtilis* spores, the release  
59 of this complex precedes cortex hydrolysis.

60 In the past decade, a few transcriptomic studies (11, 12), quantitative proteomic studies (13-19)  
61 and a lipoproteomic study (20) have been done on *C. difficile* vegetative cells. Lawley and  
62 colleagues described a protocol to purify spores and performed an extensive proteomic

63 characterization of *C. difficile* 630 spores (21). Shortly after, we used a gel-free proteomic  
64 method and a one-pot sample processing method that focused on the spore surface layers of *B.*  
65 *cereus* and *C. difficile* (22). Moreover, previous studies have described exosporium removal  
66 methods for *C. difficile* spores, and examined the exosporium protein components (23) as well as  
67 spore surface glycoproteins (24). Yet, none of these studies focusses on a comparative analysis  
68 that functionally links the spore and vegetative cell proteome. In the present study, we have  
69 quantitatively characterized the *C. difficile* vegetative cell proteome relative to that of spores. To  
70 this end, spores are mixed with  $^{15}\text{N}$ -metabolically labelled vegetative cells based on spore or cell  
71 number and the mixture is processed with our recently developed one-pot method for mass  
72 spectrometric analyses, where the  $^{14}\text{N}/^{15}\text{N}$  isotopic protein ratios represent the relative spore over  
73 vegetative cell protein abundances. We aim to deduce putative spore- and vegetative cell-  
74 predominant protein markers for *C. difficile*.

75

## 76 **Materials and Methods**

### 77 **Bacterial strains, cell culture, and sporulation**

78 *Clostridioides difficile* strain 630 (ATCC<sup>®</sup> BAA1382<sup>™</sup>), acquired from the Leibniz Institute of  
79 Microorganisms and Cell Cultures, Germany, was used to derive vegetative cells and spores. All  
80 cultivations were performed at 37°C in an anaerobic chamber (Whitley DG250) supplied with a  
81 gas mixture comprising 10% hydrogen, 10% carbon dioxide, and 80% nitrogen. The cells were  
82 first grown overnight in Schaedler anaerobic broth (Oxoid, CM0497) and further passaged thrice  
83 through the newly developed  $^{15}\text{N}$ -yeastolate medium (described below) to obtain  $^{15}\text{N}$ -labelled  
84 vegetative cells. After the third passage, the cells were grown overnight until  $\text{OD}_{600} \approx 1.7$  and  
85 harvested by centrifugation. These cells were then aliquoted and stored at -20°C until further use.

86 To obtain spores, the vegetative cells were pre-cultured overnight in Columbia broth and  
87 inoculated in Clospore medium (25). Typically, bottles containing 500 ml of Clospore medium,  
88 kept in the anaerobic chamber overnight, were inoculated with the pre-cultures. Spores were  
89 harvested after 2 weeks of incubation and intensively purified using a combination of ultra-  
90 sonication, enzyme treatment (lysozyme, trypsin, and proteinase K), and washing with sterile  
91 milli-Q water (21, 25). The spore crops were subjected to density gradient centrifugation by  
92 layering spores suspended in 20% Histodenz (Sigma-Aldrich, USA) on top of 50% Histodenz in  
93 2 ml Eppendorf tubes, and centrifuging for 25 min at 15000×g.

#### 94 **Preparation of <sup>15</sup>N-yeastolate medium**

95 *Saccharomyces cerevisiae* CEN. PK1137D was grown at 37°C in a defined CBS medium(26)  
96 modified with <sup>15</sup>NH<sub>4</sub>Cl (replacing (NH<sub>4</sub>)<sub>2</sub>SO<sub>4</sub>) as the sole nitrogen source. Yeast cells were  
97 harvested by centrifugation (5000 ×g, 30 min) and washed with water. The protocol to generate  
98 yeastolate was adapted from previous studies (27, 28). The yeast cells were made into a 30%  
99 (w/v) slurry, ultrasonicated by a tip ultrasonicator for 30 min. The pH of the slurry was adjusted  
100 to 7.5 using NaOH before incubating under continuous shaking for 5 days at 50°C. Thereafter,  
101 the slurry was ultrasonicated again and centrifuged at 20000×g for 30 min to collect the  
102 supernatant. The pellet was washed twice and the supernatants were combined and lyophilized,  
103 to generate powdered yeastolate. The final yeastolate medium contained 2% <sup>15</sup>N-yeastolate, 2%  
104 glucose, and 0.2% NaCl.

#### 105 **One-pot sample processing**

106 The one-pot protocol has been previously described in detail (17). Typically, spores & cells were  
107 mixed in 1:1 ratio based on the spore or cell counts and suspended in lysis buffer and disrupted  
108 for seven cycles with 0.1 mm zirconium beads (BioSpec Products, Bartlesville, OK, USA) using

109 a Precellys 24 homogenizer (Bertin Technologies, Aix en Provence, France). The tubes were  
110 incubated for 1 h at 56°C and alkylated using 15 mM iodoacetamide for 45 min at room  
111 temperature in the dark. The reaction was quenched with 20 mM thiourea and digestion with  
112 Lys-C (at 1:200 protease/protein ratio) was carried out for 3 h at 37°C. Samples were diluted  
113 with 50 mM ammonium bicarbonate buffer and digested with trypsin (at 1:100 protease/protein  
114 ratio) was carried out at 37°C for 18 h. The tryptic digest was freeze-dried. Before use, the  
115 freeze-dried samples were re-dissolved in 0.1% TFA and desalted using Omix  $\mu$ C18 pipette tips  
116 (80  $\mu$ g capacity, Varian, Palo Alto, CA, USA) according to the manufacturer's instructions.

### 117 **Fractionation of peptides**

118 ZIC-HILIC chromatography was used to fractionate the freeze-dried peptide samples. Dried  
119 digests were dissolved in 500  $\mu$ l of Buffer A (85% acetonitrile, 5 mM ammonium acetate, 0.4%  
120 acetic acid, pH 5.8), centrifuged to remove any undissolved components, and injected into the  
121 chromatography system. An isocratic flow with 100% Buffer A for 10 min was followed by a  
122 gradient of 0-30% Buffer B (30% acetonitrile, 5 mM ammonium acetate, 0.5% acetic acid, pH  
123 3.8) in the first phase and 30-100% of Buffer B in the second phase (flow rate 400  $\mu$ l/min). The  
124 peptides were eluted and collected in 10 fractions, freeze-dried, and stored at -80°C until further  
125 use.

### 126 **LC-FT-ICR MS/MS analysis**

127 ZIC-HILIC fractions were re-dissolved in 0.1% TFA, peptide concentrations were determined by  
128 measuring absorbance at 205nm and 300ng tryptic peptide mixtures were injected for analyses.  
129 LC-MS/MS data of each ZIC-HILIC fraction were acquired with an Apex Ultra Fourier  
130 transform ion cyclotron resonance mass spectrometer (Bruker Daltonics, Bremen, Germany)  
131 equipped with a 7 T magnet and a Nano electrospray Apollo II Dual Source coupled to an

132 Ultimate 3000 (Dionex, Sunnyvale, CA, USA) HPLC system. LC conditions and acquisition  
133 parameters were as described previously (17).

#### 134 **Data analysis and bioinformatics**

135 Each raw FT-MS/MS data set was mass calibrated better than 1.5 ppm on the peptide fragments  
136 from the co-injected GluFib calibrant. The 10 ZIC-HILIC fractions were jointly processed as a  
137 multfile with the MASCOT DISTILLER program (version 2.4.3.1, 64 bits), MDRO 2.4.3.0  
138 (MATRIX science, London, UK), including the Search toolbox and the Quantification toolbox.  
139 Peak-picking for both MS and MS/MS spectra was optimized for the mass resolution of up to  
140 60000. Peaks were fitted to a simulated isotope distribution with a correlation threshold of 0.7,  
141 with minimum signal to noise ratio of 2. The processed data were searched in a MudPIT  
142 approach with the MASCOT server program 2.3.02 (MATRIX science, London, UK) against the  
143 *C. difficile* 630 ORF translation database. The MASCOT search parameters were as follows:  
144 enzyme - trypsin, allowance of two missed cleavages, fixed modification - carboamidomethylat-  
145 ion of cysteine, variable modifications - oxidation of methionine and deamidation of asparagine  
146 and glutamine, quantification method - metabolic <sup>15</sup>N labelling, peptide mass tolerance and  
147 peptide fragment mass tolerance - 50 ppm. MASCOT MudPIT peptide identification threshold  
148 score of 20 and FDR of 2% were set to export the reports.

149 Using the quantification toolbox, the quantification of the light spore peptides relative to the  
150 corresponding heavy cell peptides was determined as light/heavy ratio using Simpson's  
151 integration of the peptide MS chromatographic profiles for all detected charge states. The  
152 quantification parameters were: Correlation threshold for isotopic distribution fit - 0.98, <sup>15</sup>N label  
153 content - 99.6%, XIC threshold - 0.1, all charge states on, max XIC width -120 seconds, elution  
154 time shift for heavy and light peptides - 20 seconds. All isotope ratios were manually validated

155 by inspecting the MS spectral data. The protein isotopic ratios were then calculated as the  
156 average over the corresponding peptide ratios. For each of the three replicas, the identification  
157 and quantification reports were imported into a custom made program to facilitate data  
158 combination and statistical analysis. Protein identification was validated with identifications in at  
159 least two replicas. For these identified proteins the relative quantification was calculated as the  
160 geometric mean of at least two validated light/ heavy ratios. All identification and quantification  
161 protein data are listed in **Table S1**. The mass spectrometry proteomics data have been deposited  
162 as a partial submission to the ProteomeXchange Consortium via the PRIDE (29) partner  
163 repository with the dataset identifier PXD012030.  
164 Transmembrane proteins were predicted using the default parameters on the TMHMM Server  
165 (version 2.0 <http://www.cbs.dtu.dk/services/TMHMM/>). DAVID Bioinformatics Resources tool  
166 (version 6.8) was used (30) to retrieve the functional annotation data of UniProt key word and  
167 KEGG pathway classifications. The BioCyc pathway analysis tool (31) was used to generate a  
168 cellular overview of the quantified proteins.

169

## 170 **Results**

171 **Metabolic labelling of *C. difficile* vegetative cells using  $^{15}\text{N}$ -yeastolate.** As illustrated in **Fig. 1**  
172 our culturing methods successfully yielded  $^{15}\text{N}$  labelled vegetative cells and  $^{14}\text{N}$  spores. For a  
173 number of identified  $^{15}\text{N}$  labelled vegetative cell peptides, the  $^{15}\text{N}$  label content has been  
174 calculated based on their mass spectrometric isotope patterns using the NIST isotope calculator  
175 (32). This shows that the present metabolic labelling method achieves a  $^{15}\text{N}$  label content of  $\geq$  of  
176 99.5%, which is amply sufficient for accurate protein quantification.



177 **Identification and quantification of cell and spore proteins.** A total of 1095 proteins has been  
178 identified from *C. difficile* spores and vegetative cells of which 796 have been relatively and  
179 reproducibly quantified between spores and vegetative cells (**Supplementary Table S1**). **Fig. 2**  
180 represents a distribution of quantified proteins, where the abundance of the combined spore and  
181 vegetative cell proteins indicated by the  $\log_{10}$  values of their MASCOT scores are plotted against  
182 the corresponding relative protein levels in the two morphotypes indicated by the  $\log_2$  values of  
183 the light/heavy ratios. Eighty seven proteins are considered to be predominant present in spores  
184 with a light/heavy ratio  $> 20$ , while 81 proteins are considered to be predominant present in  
185 vegetative cells with light/heavy ratios  $< 0.05$ . From the remaining 628 commonly shared  
186 proteins 18% are enriched in spores with light/heavy ratio between 1 and 20 while 82% are  
187 enriched in cells with a light/ heavy ratio between 1 and 0.05. In total, 167 proteins have been  
188 classified as membrane proteins by the TMHMM analysis (**Supplementary Table S2**). The  
189 cellular overview based on pathway analysis of the quantified proteins is represented in  
190 **Supplementary Fig. S1** indicating the pathways to which these commonly shared proteins  
191 belong.

192 **Spore-predominant proteins.** These include proteins from the spore coat and exosporium  
193 layers, classified under UniProt Keywords virion and capsid proteins, along with some rotamase  
194 proteins and metalloproteases (**Table 1**). SspA is the most abundant protein in this category,  
195 whereas an uncharacterized protein CD2657 (with 13 times higher levels in spores than in  
196 vegetative cells) is the least abundant (**Fig. 2**). The TMHMM analysis classified 26 proteins from  
197 this category as membrane proteins (**Supplementary Table S2**). Most of these are  
198 uncharacterized membrane proteins but some are known proteins such as SpoVD, SpoVAC,  
199 SpoVFB, FtsH, and DacF.

200 **Cell-predominant proteins.** These include the cytoplasmic proteins such as aminotransferases,  
201 arginine biosynthesis, elongation factors, cell shape and peptidoglycan synthesis proteins (**Table**  
202 **1**). The surface layer protein SlpA is the most abundant and unique protein in this category,  
203 whereas an uncharacterized protein CD0594 (with levels 27 times higher in vegetative cells than  
204 in spores) is the least abundant (**Fig. 2**). Eighteen membrane proteins are predominant in  
205 vegetative cells, as predicted by TMHMM (**Supplementary Table S2**).

206 **Proteins shared between spores and vegetative cells.** The proteins shared between spores and  
207 cells are mostly ribosomal proteins, cell cycle-regulating and/or associated proteins, and  
208 cytosolic proteins involved in pathways required for anabolism and catabolic pathways of energy  
209 metabolism distributed over 46 categories by DAVID (**Table 1, Supplementary Fig. S1**). These  
210 also include products of 25 essential genes(33) such as peptidoglycan synthesis protein MurG  
211 (CD2651) and formate-tetrahydrofolate ligase CD0718 (2 and 2.4 times higher levels in spores  
212 than in vegetative cells, respectively), and S-adenosylmethionine synthase MetK as well as a  
213 rubrerythrin CD0825 (~4 and ~9 times higher levels in vegetative cells than in spores,  
214 respectively) (**Fig 2**). The TMHMM analysis of the shared proteins identified 123 membrane  
215 proteins (**Supplementary Table S2**), such as the phosphotransferase system (PTS) of sugar  
216 transporters, ABC-type transporters, and V-type ATPases. These also included most proteins  
217 involved in the Wood-Ljungdahl pathway (**Fig. 3**). From **Table 1** it can be deduced that proteins  
218 from this category that are present in spores are essentially those that are required for  
219 hibernation, the initiation of growth and the resumption of metabolism upon germination and  
220 initiation of outgrowth.

221

222 **Discussion**

223 To our knowledge, the proteomes of *C. difficile* vegetative cells and spores have been explored  
224 for the first time in a single experimental set-up to understand the fundamental differences  
225 between these two morphological forms of the bacterium. To this end, spores and <sup>15</sup>N-labelled  
226 vegetative cells have been mixed for relative quantification. Metabolic labelling using <sup>15</sup>N  
227 isotopes is a highly accurate means of proteome quantification (34). However, a method for  
228 labelling *C. difficile* was unavailable until recently (19). Here a method for metabolic labelling  
229 using <sup>15</sup>N-labelled yeastolate medium has been developed which provides a simple, economical,  
230 and rapid means to perform quantitative proteomics of a variety of pathogenic and non-  
231 pathogenic microbes. Our analyses show that 80% of the quantified proteins are common for  
232 both cells and spores, indicating that pathogenic *C. difficile* employs a relatively modest  
233 proteomic changeover to enable long-term survival as a dormant spore. The corresponding  
234 pathways are shared between vegetative cells and spores (**Supplementary Fig. S1**) however the  
235 relative quantities of these proteins vary between cells and spores. A discussion of quantified and  
236 functionally key proteins of *C. difficile* is presented below.

237 *Clostridioides difficile* expresses an array of cell surface proteins, including the S-layer protein  
238 SlpA and its paralogues from the cell wall protein (CWP) family. Eight Cwp family proteins are  
239 quantified: Cwp18 and 22 are identified in both morphotypes, with higher levels in spores,  
240 whereas Cwp2, 5, 6, 19, 84, and CwpV are identified in vegetative cells. Cwp22, a functional  
241 homologue of LD-transpeptidase (Ldt<sub>cd2</sub>), is an important spore protein that plays a role in  
242 peptidoglycan remodelling and confers resistance to β-lactam antibiotics (35, 36). CwpV  
243 promotes *C. difficile* aggregation and its strain-dependent structural variations may assist in  
244 evading the host antibody response (37) or to launch an anti-phage strategy (38). *Clostridioides*  
245 *difficile* spores frequently have an interspace region between the spore coat and the fragile,

246 heterogeneous exosporium (39, 40). Although most known and putative exosporium proteins  
247 described previously (23) have been identified in this study, the BclA family of proteins have not  
248 (except BclA1 (CD0332), identified in one replicate and thus not quantified). An absence of hair-  
249 like structures in the *C. difficile* 630 exosporium (40) may underlie this finding. Other identified  
250 proteins such as CD1474, CD2845, and CD1524 - all rubrerythrins -likely present in the  
251 exosporium, may play a role in fighting reactive oxygen species and oxidative stress (41).

252 *Clostridioides difficile* relies heavily on the phosphoenolpyruvate-dependent phospho-  
253 transferase system (PTS) for uptake and regulation of various sugars and sugar derivatives (42).  
254 The PTS is clearly advantageous for germinating spores, since various sugars are readily  
255 available in the human gut and may thus be used to facilitate outgrowth and establish infection  
256 (43, 44). We have identified 22 PTS proteins, of which 15 could be quantified (**Supplementary**  
257 **Table S1**). The quantified PTS proteins, except CD3027, are shared between vegetative cells and  
258 spores. Along with the central PTS proteins HPr (PtsH/CD2756) and Enzyme I (PtsI/CD2755),  
259 these proteins function in the transport of fructose (FruABC/CD2269, CD2486-88), glucose  
260 (PtsG/CD2667, CD3027, CD3089), mannitol (MtlF/CD2332 and MtlA/CD2334)), mannose  
261 (CD3013-14), xyloside (XynB/CD3068), and  $\beta$ -glucoside (BglF5/CD3137). Although shared,  
262 CD3013-14, CD2486-88, CD3089, PtsH, and MtlA-F showed relatively higher levels in spores,  
263 whereas PtsG, PtsI, BglF5, FruABC, CD3027, and XynB show lower levels in spores.  
264 Interestingly, a previous study has shown that in germinating spores, *bglF5* and *ptsG* transcripts  
265 are downregulated whereas those of *fruABC* and *cd2486-87* are upregulated (45). In mouse  
266 infections, *C. difficile* CD2487 is upregulated 14 h post-infection whereas proteins XynB,  
267 CD3027, and PtsI are downregulated 38 h post-infection (11). In pig infections of *C. difficile*  
268 PtsI, BglF5 (4-12 h post-infection) and MtlA (only 12 h post-infection) are upregulated (46) and

269 XynB and CD3013-14 are downregulated. Furthermore, MtlA and MtlF can repress *tcdA* and  
270 *tcdB* toxin expression in *C. difficile* (47). Put together, these studies indicate that PtsI, BglF5,  
271 CD2487, and MtlA potentially play a role in the pathogenesis of *C. difficile* infections; CD2487  
272 and MtlA are predominantly present in spores, making them important targets in understanding  
273 spore persistence.

274 Non-PTS transport systems are also involved in carbohydrate uptake in clostridia (42). Of all  
275 ATPases and related proteins quantified, only 6 and 4 proteins belong to the cell-predominant  
276 and spore-predominant categories, respectively. Four V-type ATPases have been quantified;  
277 however, only AtpC is spore-predominant whereas the other three are also expressed in cells.  
278 AtpC is associated with proton transport, possesses a hydrolase activity, and contains a CodY-  
279 binding region (48) potentially repressing toxin expression in *C. difficile* (49). It also regulates  
280 synthesis and circulation of pyruvate and 2-oxoglutarate in the cell (50), providing proteomic  
281 flexibility during spore revival. The spore-predominant ATPases include a cation ( $\text{Ca}^{2+}$ )-  
282 transporting ATPase (CD2503), which shares 42% identity with *B. subtilis* YloB ATPase, likely  
283 responsible for accumulating intracellular calcium and reinforcing thermal resistance(51). Two  
284 ABC-type transporters - lipoproteins CD2365 and SsuA - are expressed in both *C. difficile*  
285 vegetative cells and spores (20) but are present at higher levels in spores. These are  
286 alkanesulfonate and taurine binding proteins, respectively and SsuA is involved in sulfur  
287 metabolism (52). Interestingly, the taurine side chain of taurocholate selectively binds its  
288 potential receptor site(53) and taurine itself is an alkane sulfonate, thus higher levels of SsuA and  
289 CD2365 in spores could indicate potential taurine interaction during germination, similar to  
290 CD3298(54). Identified protein CD0114 shares 25% identity with CD3298, making it worth

291 studying for a possible role in spore germination. Additionally, CD3669 - an orthologue of GerM  
292 -might be involved in sporulation (55).

293 The 'stay-green' family protein CD3613 is a putative exosporium protein. Usually, these proteins  
294 perform chlorophyll degradation (56) but the upregulation of CD3613 during sporulation in a  
295 mouse model (11) suggests a potential role in pathogenesis. CD2434 has an UBA\_NAC\_like  
296 bacterial protein domain commonly found in proteins involved in ubiquitin-dependent  
297 proteolysis (57). Although not a direct evidence, this observation suggests involvement of  
298 CD2434 in pathogenesis; a previous study has shown that the *E. coli* toxin CNF1 utilizes the  
299 ubiquitin-proteasome assembly of host cells to partially inactivate their Rho GTPases (58), a  
300 mechanism similar to that of TcdA and TcdB toxins (59). The spore envelope protein CD2635  
301 may be involved in germination (12). This protein, similar to CD2636, contains a characteristic  
302 YIEGIA domain and both could play significant roles in spore assembly as well as  
303 disintegration.

304 Amino acids play a crucial role in spore germination and functioning of the Stickland pathways  
305 in *C. difficile*. CD3458 and CD1555 are putative amino acid permeases identified to be slightly  
306 more abundant in spores than in vegetative cells. CD3458 contains a putative amino acid  
307 permease domain and an SLC5-6-like\_sbd superfamily domain, thus qualifying as an amino acid  
308 permease and sodium/glucose co-transporter. Another amino acid permease CD2612, identified  
309 in vegetative cells, is upregulated in the presence of cysteine (52), implying a role in sulfur  
310 metabolism. CD2344 contains an Asp-Al\_Ex domain found in aspartate-alanine antiporters and  
311 might be capable of developing a membrane potential enough to carry ATP synthesis via FoF1  
312 ATPase (60).

313 Peptidases and proteases are crucial for vegetative cell and spore survival. In this study, 29  
314 peptidases and 12 proteases are identified and quantified. These include proteins involved in  
315 germination, such as Gpr (CD2470) and CspBA. In the present study, CspC protease has been  
316 detected in only one replicate and thus not quantified. Other proteins involved in cellular  
317 regulatory processes, such as ATP-dependent Clp proteases, zinc metalloproteases, serine  
318 proteases, Lon proteases, have also been quantified in the present study. These peptidases belong  
319 to various families such as aminopeptidase (M1), metalloendopeptidase (M16), aminopeptidase  
320 (M18), membrane dipeptidase (M19), glutamate carboxypeptidase (M20), glycoprotease (M22),  
321 methionyl aminopeptidase (M24), prolyl oligopeptidase (S9), and collagenase (U32). It is  
322 speculated that proteins belonging to the M22 and U32 family (CD0150 and CD1228,  
323 respectively) function in spore germination. In fact, BA0261, a CD0150 orthologue in *B.*  
324 *anthracis*, is suggested to play a role in spore germination (61) and a collagenase is implicated in  
325 virulence of *B. cereus* endophthalmitis (62) indicating a similar potential for CD1228. A  
326 previous study suggested that a Lon protease in *Brucella* sp. is involved in BALB/c mice  
327 infections (63). Thus, the Lon protease CD3301, present in vegetative cells and spores, also  
328 likely plays a role in infection. CD0684 has been previously reported to be present in *C. difficile*  
329 spores under  $\sigma^G$  regulation and suggested to be involved in stress resistance (12). Notably, in the  
330 present study, none of the identified peptidases or proteases are found to be predominant in  
331 vegetative cells.

332 From the quantified dataset 198 proteins are classified to the metabolic pathways category by  
333 DAVID analysis. Although the spores are metabolically dormant, the proteins belonging to the  
334 amino acid biosynthesis, purine metabolism, glycolysis, fatty acid metabolism, and nitrogen  
335 metabolism are present and form the core protein set in spores. Moreover, in spores, arginine

336 biosynthesis pathway proteins are present at ~20% of the levels detected in vegetative cells. This  
337 indicates that germinating spores require *de novo* synthesis of these proteins post-germination to  
338 assist the outgrowing cells. Ribosomal proteins - except the 50S ribosomal protein L30  
339 (CD0881) - are also present in low amounts in *C. difficile* spores. CD0881 has a ferredoxin-like  
340 fold, resembling the structure of yeast L7 proteins, and is likely involved in processing  
341 precursors of large rRNAs (64), a function that could well aid the outgrowing spores. The  
342 phosphate butyryltransferases (CD0715 and CD0112/Ptb) involved in the butanoate metabolism  
343 pathway are present not only in vegetative cells but also in spores, thus conferring on the spores  
344 a metabolic flexibility.

345 *Clostridioides difficile* may deploy several sulfur and nitrogen metabolism proteins while  
346 surviving in anaerobic conditions. Of these, only CD2431, a nitrite/sulfite reductase, is abundant  
347 in spores. This protein also contains a 4Fe-4S domain and can catalyse the reduction of sulfite to  
348 sulfide and nitrite to ammonia (65). *Clostridioides difficile* and other acetogenic clostridia have  
349 acquired such metabolic flexibility that they can directly utilize the CO<sub>2</sub> and H<sub>2</sub> from air and  
350 yield a variety of products including acetate and methane (66). The Wood-Ljungdahl pathway of  
351 acetogenesis is believed to be the first biochemical pathway to have emerged on earth (67) and  
352 all proteins involved in this pathway are identified in *C. difficile* 630, which reinforces the  
353 acetogenic nature of *C. difficile* growth. Of these, CD3405, CD3407 and CD0730 have been  
354 detected only in single replicates and thus are not quantified. The other Wood-Ljungdahl  
355 pathway proteins have all been quantified, with only three proteins - MetF (CD0722), CD0728,  
356 and CD3258 - being highly abundant in spores. In contrast, only a single protein - CD0893 - is  
357 predominant in vegetative cells.



358 The acetogenic mode of life of *C. difficile* requires specific enzymes, such as acetyl-CoA  
359 synthases/CO dehydrogenases (CD0174, CD0176, and CD0727), formate dehydrogenases  
360 (CD2179), and iron-only hydrogenases (CD0893, CD3258, and CD3406). Enzymes CD0174 and  
361 CD0176 synthesize the key metabolite acetyl-CoA from CO, methyl corrinoid, and CoASH. The  
362 formate dehydrogenases can be seleno (CD3317) or non-seleno (CD0769 and CD2179)  
363 enzymes. Protein CD2179, an anaerobic dehydrogenase, reduces CO<sub>2</sub> to formate which is further  
364 metabolized to acetyl-CoA through enzymatic reactions, one of them involving another acetyl-  
365 CoA synthase/CO dehydrogenase with a methyltransferase subunit. In acetogens lacking  
366 cytochromes, the Rnf complex (encoded by CD1137-42) is the putative coupling site for energy  
367 conservation (66). In the present study, all components of the Rnf complex, except CD1140-41,  
368 have been identified. The Rnf complex proteins, together with electron transport flavoproteins  
369 etfA2/B2 (CD1055-56), are employed in butyrate formation (68). However, the present study has  
370 identified only etfA1/B1 and etfA3/B3 proteins. These proteins are predominant in vegetative  
371 cells, indicating that they likely function exclusively during the vegetative life cycle of *C.*  
372 *difficile*.

373 The iron-only hydrogenases, 10 times more efficient in hydrogen production than [NiFe]  
374 hydrogenases (69), are abundant in clostridia. *Clostridioides difficile* encodes two trimeric and  
375 three monomeric hydrogenases (70). Moreover, proteins CD3405-3407 function as electron-  
376 bifurcating hydrogenases whereby physiological electron carriers such as ferredoxin are used for  
377 H<sub>2</sub> production (71). In the present study, CD3258 is seen predominantly in spores whereas  
378 CD0893 occurs mostly in vegetative cells. Both proteins are monomeric, ferredoxin  
379 dependent(71), and contain a H-cluster i.e. a centre for hydrogen production (72). However,  
380 CD3258 has a sequence of eight cysteines for stabilizing two [4Fe4S] clusters transferring

381 electrons from the surface to the protein's active site (73) whereas CD0893 has a single FeS  
382 domain with a (CX<sub>1-4</sub>CX<sub>5-9</sub>CX<sub>3</sub>C) arrangement at its N-terminus and the H-cluster has an  
383 additional cysteine residue (TSCCCP<sub>x</sub>W(70)). The predominant expression of CD3258 and  
384 CD0893 in spores and vegetative cells, respectively, indicates the distinct roles of these proteins  
385 in *C. difficile* physiology.

386 In addition, a few noteworthy and yet uncharacterized proteins are detected in our study.  
387 CD1470, a sulfotransferase, may be involved in cyanide detoxification. PdaA1 (CD1430) and  
388 PdaA2 (CD2719) have recently been shown to be important for cortex muramic acid- $\delta$ -lactam  
389 synthesis; spores lacking it are heat sensitive, deficient in germination, and exhibit late virulence  
390 (74). CD2719 is not identified in the present study; however, CD1556, an orthologue of PdaA2  
391 of *B. cereus* var. *anthracis* is identified. Thus, CD1556 may be important for spore structure and  
392 germination. CD1319, an orthologue of YlxY, of *B. subtilis* (75) may be important for  
393 sporulation.

394

## 395 **Conclusions**

396 The one-pot sample processing method along with <sup>15</sup>N metabolic labelling has enabled a  
397 reproducible, combined cell and spore quantitative proteome analysis of the anaerobic pathogen  
398 *C. difficile* 630. The analysis outlines a relatively modest proteomic adaptation of this  
399 evolutionarily and clinically important anaerobic pathogen, when as a survival strategy, it  
400 completes spore formation. In addition to specific cell and spore surface proteins, the study has  
401 qualified vegetative cell proteins CD1228, CD3301 and spore proteins CD2487, CD2434 and  
402 CD0684 as potential protein markers for *C. difficile* infections.

403

404 **Acknowledgements**

405 W.R.A is supported by the grant NWO ALWOP.260. L.Z. acknowledges the Erasmus Mundus  
406 program (EMEA3) and TNO (Healthy Living) for funding this research.

407

408 **Author Contributions**

409 W.R.A analysed the data, prepared the figures and tables and wrote the main manuscript text.

410 L.Z. performed the experiments. L. dK conceptualized and designed the experiments as well as

411 curated and processed the proteomics data. S.B. and C. dK supervised and mentored the research.

412 All authors reviewed the manuscript.

413

414 **Competing interests**

415 The authors declare no competing interests.

416 **References**

417 1. Shin, J. H.; Chaves-Olarte, E.; Warren, C. A., *Clostridium difficile* Infection. *Microbiol*  
418 *Spectr* **2016**, 4, (3).

419 2. Bagdasarian, N.; Rao, K.; Malani, P. N., Diagnosis and treatment of *Clostridium difficile*  
420 in adults: a systematic review. *JAMA* **2015**, 313, (4), 398-408.

421 3. Aktories, K.; Schwan, C.; Jank, T., *Clostridium difficile* Toxin Biology. *Annu Rev*  
422 *Microbiol* **2017**, 71, 281-307.

423 4. Deakin, L. J.; Clare, S.; Fagan, R. P.; Dawson, L. F.; Pickard, D. J.; West, M. R.; Wren,  
424 B. W.; Fairweather, N. F.; Dougan, G.; Lawley, T. D., The *Clostridium difficile* spo0A gene is a  
425 persistence and transmission factor. *Infect Immun* **2012**, 80, (8), 2704-11.

- 426 5. Francis, M. B.; Allen, C. A.; Shrestha, R.; Sorg, J. A., Bile acid recognition by the  
427 *Clostridium difficile* germinant receptor, CspC, is important for establishing infection. *PLoS*  
428 *Pathog* **2013**, 9, (5), e1003356.
- 429 6. Galperin, M. Y.; Mekhedov, S. L.; Puigbo, P.; Smirnov, S.; Wolf, Y. I.; Rigden, D. J.,  
430 Genomic determinants of sporulation in Bacilli and Clostridia: towards the minimal set of  
431 sporulation-specific genes. *Environ Microbiol* **2012**, 14, (11), 2870-90.
- 432 7. Paredes-Sabja, D.; Shen, A.; Sorg, J. A., *Clostridium difficile* spore biology: sporulation,  
433 germination, and spore structural proteins. *Trends Microbiol* **2014**, 22, (7), 406-16.
- 434 8. Fimlaid, K. A.; Bond, J. P.; Schutz, K. C.; Putnam, E. E.; Leung, J. M.; Lawley, T. D.;  
435 Shen, A., Global Analysis of the Sporulation Pathway of *Clostridium difficile*. *PLOS Genetics*  
436 **2013**, 9, (8), e1003660.
- 437 9. Pereira, F. C.; Saujet, L.; Tomé, A. R.; Serrano, M.; Monot, M.; Couture-Tosi, E.;  
438 Martin-Verstraete, I.; Dupuy, B.; Henriques, A. O., The Spore Differentiation Pathway in the  
439 Enteric Pathogen *Clostridium difficile*. *PLOS Genetics* **2013**, 9, (10), e1003782.
- 440 10. Francis, M. B.; Allen, C. A.; Sorg, J. A., Spore Cortex Hydrolysis Precedes Dipicolinic  
441 Acid Release during *Clostridium difficile* Spore Germination. *J Bacteriol* **2015**, 197, (14), 2276-  
442 83.
- 443 11. Janoir, C.; Deneve, C.; Bouttier, S.; Barbut, F.; Hoys, S.; Caleechum, L.; Chapeton-  
444 Montes, D.; Pereira, F. C.; Henriques, A. O.; Collignon, A.; Monot, M.; Dupuy, B., Adaptive  
445 strategies and pathogenesis of *Clostridium difficile* from in vivo transcriptomics. *Infect Immun*  
446 **2013**, 81, (10), 3757-69.
- 447 12. Saujet, L.; Pereira, F. C.; Serrano, M.; Soutourina, O.; Monot, M.; Shelyakin, P. V.;  
448 Gelfand, M. S.; Dupuy, B.; Henriques, A. O.; Martin-Verstraete, I., Genome-wide analysis of

- 449 cell type-specific gene transcription during spore formation in *Clostridium difficile*. *PLoS Genet*  
450 **2013**, 9, (10), e1003756.
- 451 13. Chen, J. W.; Scaria, J.; Mao, C.; Sobral, B.; Zhang, S.; Lawley, T.; Chang, Y. F.,  
452 Proteomic comparison of historic and recently emerged hypervirulent *Clostridium difficile*  
453 strains. *J Proteome Res* **2013**, 12, (3), 1151-61.
- 454 14. Chilton, C. H.; Gharbia, S. E.; Fang, M.; Misra, R.; Poxton, I. R.; Borriello, S. P.; Shah,  
455 H. N., Comparative proteomic analysis of *Clostridium difficile* isolates of varying virulence. *J*  
456 *Med Microbiol* **2014**, 63, (Pt 4), 489-503.
- 457 15. Jain, S.; Graham, C.; Graham, R. L.; McMullan, G.; Ternan, N. G., Quantitative  
458 proteomic analysis of the heat stress response in *Clostridium difficile* strain 630. *J Proteome Res*  
459 **2011**, 10, (9), 3880-90.
- 460 16. Otto, A.; Maass, S.; Lassek, C.; Becher, D.; Hecker, M.; Riedel, K.; Sievers, S., The  
461 protein inventory of *Clostridium difficile* grown in complex and minimal medium. *Proteomics*  
462 *Clin Appl* **2016**, 10, (9-10), 1068-1072.
- 463 17. Swarge, B. N.; Roseboom, W.; Zheng, L.; Abhyankar, W. R.; Brul, S.; de Koster, C. G.;  
464 de Koning, L. J., "One-Pot" Sample Processing Method for Proteome-Wide Analysis of  
465 Microbial Cells and Spores. *Proteomics Clin Appl* **2018**, 12, (5), e1700169.
- 466 18. Ternan, N. G.; Jain, S.; Srivastava, M.; McMullan, G., Comparative transcriptional  
467 analysis of clinically relevant heat stress response in *Clostridium difficile* strain 630. *PLoS One*  
468 **2012**, 7, (7), e42410.
- 469 19. Trautwein-Schult, A.; Maass, S.; Plate, K.; Otto, A.; Becher, D., A Metabolic Labeling  
470 Strategy for Relative Protein Quantification in *Clostridioides difficile*. *Front Microbiol* **2018**, 9,  
471 2371.

- 472 20. Charlton, T. M.; Kovacs-Simon, A.; Michell, S. L.; Fairweather, N. F.; Tate, E. W.,  
473 Quantitative Lipoproteomics in *Clostridium difficile* Reveals a Role for Lipoproteins in  
474 Sporulation. *Chem Biol* **2015**, 22, (11), 1562-1573.
- 475 21. Lawley, T. D.; Croucher, N. J.; Yu, L.; Clare, S.; Sebahia, M.; Goulding, D.; Pickard, D.  
476 J.; Parkhill, J.; Choudhary, J.; Dougan, G., Proteomic and genomic characterization of highly  
477 infectious *Clostridium difficile* 630 spores. *J Bacteriol* **2009**, 191, (17), 5377-86.
- 478 22. Abhyankar, W. R.; Hossain, A. H.; Djajasaputra, A.; Permpoonpattana, P.; Ter Beek, A.;  
479 Dekker, H. L.; Cutting, S. M.; Brul, S.; de Koning, L. J.; de Koster, C. G., In pursuit of protein  
480 targets: proteomic characterization of bacterial spore outer layers. *J Proteome Res* **2013**, 12, (10),  
481 4507-21.
- 482 23. Díaz-González, F.; Milano, M.; Olguin-Araneda, V.; Pizarro-Cerda, J.; Castro-Cordova,  
483 P.; Tzeng, S. C.; Maier, C. S.; Sarker, M. R.; Paredes-Sabja, D., Protein composition of the  
484 outermost exosporium-like layer of *Clostridium difficile* 630 spores. *J Proteomics* **2015**, 123, 1-  
485 13.
- 486 24. Strong, P. C.; Fulton, K. M.; Aubry, A.; Foote, S.; Twine, S. M.; Logan, S. M.,  
487 Identification and characterization of glycoproteins on the spore surface of *Clostridium difficile*.  
488 *J Bacteriol* **2014**, 196, (14), 2627-37.
- 489 25. Perez, J.; Springthorpe, V. S.; Sattar, S. A., Clospore: a liquid medium for producing high  
490 titers of semi-purified spores of *Clostridium difficile*. *JAOAC Int* **2011**, 94, (2), 618-26.
- 491 26. Verduyn, C.; Postma, E.; Scheffers, W. A.; Van Dijken, J. P., Effect of benzoic acid on  
492 metabolic fluxes in yeasts: a continuous-culture study on the regulation of respiration and  
493 alcoholic fermentation. *Yeast* **1992**, 8, (7), 501-17.

- 494 27. Egorova-Zachernyuk, T. A.; Bosman, G. J.; Pistorius, A. M.; DeGrip, W. J., Production  
495 of yeastolates for uniform stable isotope labelling in eukaryotic cell culture. *Appl Microbiol*  
496 *Biotechnol* **2009**, 84, (3), 575-81.
- 497 28. Opitz, C.; Isogai, S.; Grzesiek, S., An economic approach to efficient isotope labeling in  
498 insect cells using homemade <sup>15</sup>N-, <sup>13</sup>C- and <sup>2</sup>H-labeled yeast extracts. *J Biomol NMR* **2015**, 62,  
499 (3), 373-85.
- 500 29. Vizcaino, J. A.; Deutsch, E. W.; Wang, R.; Csordas, A.; Reisinger, F.; Rios, D.; Dianes,  
501 J. A.; Sun, Z.; Farrah, T.; Bandeira, N.; Binz, P. A.; Xenarios, I.; Eisenacher, M.; Mayer, G.;  
502 Gatto, L.; Campos, A.; Chalkley, R. J.; Kraus, H. J.; Albar, J. P.; Martinez-Bartolome, S.;  
503 Apweiler, R.; Omenn, G. S.; Martens, L.; Jones, A. R.; Hermjakob, H., ProteomeXchange  
504 provides globally coordinated proteomics data submission and dissemination. *Nat Biotechnol*  
505 **2014**, 32, (3), 223-6.
- 506 30. Huang da, W.; Sherman, B. T.; Lempicki, R. A., Systematic and integrative analysis of  
507 large gene lists using DAVID bioinformatics resources. *Nat Protoc* **2009**, 4, (1), 44-57.
- 508 31. Paley, S. M.; Karp, P. D., The Pathway Tools cellular overview diagram and Omics  
509 Viewer. *Nucleic Acids Res* **2006**, 34, (13), 3771-8.
- 510 32. Kilpatrick, E. L.; Liao, W. L.; Camara, J. E.; Turko, I. V.; Bunk, D. M., Expression and  
511 characterization of <sup>15</sup>N-labeled human C-reactive protein in *Escherichia coli* and *Pichia pastoris*  
512 for use in isotope-dilution mass spectrometry. *Protein Expr Purif* **2012**, 85, (1), 94-9.
- 513 33. Larocque, M.; Chenard, T.; Najmanovich, R., A curated *C. difficile* strain 630 metabolic  
514 network: prediction of essential targets and inhibitors. *BMC Syst Biol* **2014**, 8, 117.
- 515 34. Bantscheff, M.; Schirle, M.; Sweetman, G.; Rick, J.; Kuster, B., Quantitative mass  
516 spectrometry in proteomics: a critical review. *Anal Bioanal Chem* **2007**, 389, (4), 1017-31.

- 517 35. Peltier, J.; Courtin, P.; El Meouche, I.; Lemee, L.; Chapot-Chartier, M. P.; Pons, J. L.,  
518 *Clostridium difficile* has an original peptidoglycan structure with a high level of N-  
519 acetylglucosamine deacetylation and mainly 3-3 cross-links. *J Biol Chem* **2011**, 286, (33),  
520 29053-62.
- 521 36. Ternan, N. G.; Jain, S.; Graham, R. L.; McMullan, G., Semiquantitative analysis of  
522 clinical heat stress in *Clostridium difficile* strain 630 using a GeLC/MS workflow with emPAI  
523 quantitation. *PLoS One* **2014**, 9, (2), e88960.
- 524 37. Reynolds, C. B.; Emerson, J. E.; de la Riva, L.; Fagan, R. P.; Fairweather, N. F., The  
525 *Clostridium difficile* cell wall protein CwpV is antigenically variable between strains, but  
526 exhibits conserved aggregation-promoting function. *PLoS Pathog* **2011**, 7, (4), e1002024.
- 527 38. Sekulovic, O.; Ospina Bedoya, M.; Fivian-Hughes, A. S.; Fairweather, N. F.; Fortier, L.  
528 C., The *Clostridium difficile* cell wall protein CwpV confers phase-variable phage resistance.  
529 *Mol Microbiol* **2015**, 98, (2), 329-42.
- 530 39. Permpoonpattana, P.; Tolls, E. H.; Nadem, R.; Tan, S.; Brisson, A.; Cutting, S. M.,  
531 Surface layers of *Clostridium difficile* endospores. *J Bacteriol* **2011**, 193, (23), 6461-70.
- 532 40. Pizarro-Guajardo, M.; Calderon-Romero, P.; Castro-Cordova, P.; Mora-Uribe, P.;  
533 Paredes-Sabja, D., Ultrastructural Variability of the Exosporium Layer of *Clostridium difficile*  
534 Spores. *Appl Environ Microbiol* **2016**, 82, (7), 2202-2209.
- 535 41. Sztukowska, M.; Bugno, M.; Potempa, J.; Travis, J.; Kurtz, D. M., Jr., Role of  
536 rubrerythrin in the oxidative stress response of *Porphyromonas gingivalis*. *Mol Microbiol* **2002**,  
537 44, (2), 479-88.
- 538 42. Mitchell, W. J.; Tangney, M., Carbohydrate Uptake by the Phosphotransferase System  
539 and Other Mechanisms. In *Handbook on Clostridia*, 1 ed.; Dürre, P., Ed. CRC Press: Taylor &



- 540 Francis Group 6000 Broken Sound Parkway NW Boca Raton, FL 33487–2742, 2005; pp 196-  
541 225.
- 542 43. Chassard, C.; Lacroix, C., Carbohydrates and the human gut microbiota. *Curr Opin Clin*  
543 *Nutr Metab Care* **2013**, 16, (4), 453-60.
- 544 44. Flint, H. J.; Scott, K. P.; Louis, P.; Duncan, S. H., The role of the gut microbiota in  
545 nutrition and health. *Nat Rev Gastroenterol Hepatol* **2012**, 9, (10), 577-89.
- 546 45. Dembek, M.; Stabler, R. A.; Witney, A. A.; Wren, B. W.; Fairweather, N. F.,  
547 Transcriptional analysis of temporal gene expression in germinating *Clostridium difficile* 630  
548 endospores. *PLoS One* **2013**, 8, (5), e64011.
- 549 46. Scaria, J.; Janvilisri, T.; Fubini, S.; Gleed, R. D.; McDonough, S. P.; Chang, Y. F.,  
550 *Clostridium difficile* transcriptome analysis using pig ligated loop model reveals modulation of  
551 pathways not modulated in vitro. *J Infect Dis* **2011**, 203, (11), 1613-20.
- 552 47. Dupuy, B.; Sonenshein, A. L., Regulated transcription of *Clostridium difficile* toxin  
553 genes. *Mol Microbiol* **1998**, 27, (1), 107-20.
- 554 48. Dineen, S. S.; McBride, S. M.; Sonenshein, A. L., Integration of metabolism and  
555 virulence by *Clostridium difficile* CodY. *J Bacteriol* **2010**, 192, (20), 5350-62.
- 556 49. Dineen, S. S.; Villapakkam, A. C.; Nordman, J. T.; Sonenshein, A. L., Repression of  
557 *Clostridium difficile* toxin gene expression by CodY. *Mol Microbiol* **2007**, 66, (1), 206-19.
- 558 50. Sonenshein, A. L., Control of key metabolic intersections in *Bacillus subtilis*. *Nat Rev*  
559 *Microbiol* **2007**, 5, (12), 917-27.
- 560 51. Raeymaekers, L.; Wuytack, E.; Willems, I.; Michiels, C. W.; Wuytack, F., Expression of  
561 a P-type Ca<sup>(2+)</sup>-transport ATPase in *Bacillus subtilis* during sporulation. *Cell Calcium* **2002**, 32,  
562 (2), 93.

- 563 52. Dubois, T.; Dancer-Thibonnier, M.; Monot, M.; Hamiot, A.; Bouillaut, L.; Soutourina,  
564 O.; Martin-Verstraete, I.; Dupuy, B., Control of *Clostridium difficile* Physiopathology in  
565 Response to Cysteine Availability. *Infect Immun* **2016**, 84, (8), 2389-405.
- 566 53. Howerton, A.; Ramirez, N.; Abel-Santos, E., Mapping interactions between germinants  
567 and *Clostridium difficile* spores. *J Bacteriol* **2011**, 193, (1), 274-82.
- 568 54. Kochan, T. J.; Somers, M. J.; Kaiser, A. M.; Shoshiev, M. S.; Hagan, A. K.; Hastie, J. L.;  
569 Giordano, N. P.; Smith, A. D.; Schubert, A. M.; Carlson, P. E., Jr.; Hanna, P. C., Intestinal  
570 calcium and bile salts facilitate germination of *Clostridium difficile* spores. *PLoS Pathog* **2017**,  
571 13, (7), e1006443.
- 572 55. Rodrigues, C. D.; Ramirez-Guadiana, F. H.; Meeske, A. J.; Wang, X.; Rudner, D. Z.,  
573 GerM is required to assemble the basal platform of the SpoIIIA-SpoIIQ transenvelope complex  
574 during sporulation in *Bacillus subtilis*. *Mol Microbiol* **2016**, 102, (2), 260-273.
- 575 56. Park, S. Y.; Yu, J. W.; Park, J. S.; Li, J.; Yoo, S. C.; Lee, N. Y.; Lee, S. K.; Jeong, S. W.;  
576 Seo, H. S.; Koh, H. J.; Jeon, J. S.; Park, Y. I.; Paek, N. C., The senescence-induced staygreen  
577 protein regulates chlorophyll degradation. *Plant Cell* **2007**, 19, (5), 1649-64.
- 578 57. Hofmann, K.; Bucher, P., The UBA domain: a sequence motif present in multiple  
579 enzyme classes of the ubiquitination pathway. *Trends Biochem Sci* **1996**, 21, (5), 172-3.
- 580 58. Doye, A.; Mettouchi, A.; Bossis, G.; Clement, R.; Buisson-Touati, C.; Flatau, G.;  
581 Gagnoux, L.; Piechaczyk, M.; Boquet, P.; Lemichez, E., CNF1 exploits the ubiquitin-proteasome  
582 machinery to restrict Rho GTPase activation for bacterial host cell invasion. *Cell* **2002**, 111, (4),  
583 553-64.
- 584 59. Voth, D. E.; Ballard, J. D., *Clostridium difficile* toxins: mechanism of action and role in  
585 disease. *Clin Microbiol Rev* **2005**, 18, (2), 247-63.

- 586 60. Abe, K.; Ohnishi, F.; Yagi, K.; Nakajima, T.; Higuchi, T.; Sano, M.; Machida, M.;  
587 Sarker, R. I.; Maloney, P. C., Plasmid-encoded asp operon confers a proton motive metabolic  
588 cycle catalyzed by an aspartate-alanine exchange reaction. *J Bacteriol* **2002**, 184, (11), 2906-13.
- 589 61. Liu, H.; Bergman, N. H.; Thomason, B.; Shallom, S.; Hazen, A.; Crossno, J.; Rasko, D.  
590 A.; Ravel, J.; Read, T. D.; Peterson, S. N.; Yates, J., 3rd; Hanna, P. C., Formation and  
591 composition of the *Bacillus anthracis* endospore. *J Bacteriol* **2004**, 186, (1), 164-78.
- 592 62. Beecher, D. J.; Olsen, T. W.; Somers, E. B.; Wong, A. C., Evidence for contribution of  
593 tripartite hemolysin BL, phosphatidylcholine-preferring phospholipase C, and collagenase to  
594 virulence of *Bacillus cereus* endophthalmitis. *Infect Immun* **2000**, 68, (9), 5269-76.
- 595 63. Robertson, G. T.; Reisenauer, A.; Wright, R.; Jensen, R. B.; Jensen, A.; Shapiro, L.;  
596 Roop, R. M., 2nd, The *Brucella abortus* CcrM DNA methyltransferase is essential for viability,  
597 and its overexpression attenuates intracellular replication in murine macrophages. *J Bacteriol*  
598 **2000**, 182, (12), 3482-9.
- 599 64. Dunbar, D. A.; Dragon, F.; Lee, S. J.; Baserga, S. J., A nucleolar protein related to  
600 ribosomal protein L7 is required for an early step in large ribosomal subunit biogenesis. *Proc*  
601 *Natl Acad Sci U S A* **2000**, 97, (24), 13027-32.
- 602 65. Zeghouf, M.; Fontecave, M.; Coves, J., A simplified functional version of the *Escherichia*  
603 *coli* sulfite reductase. *J Biol Chem* **2000**, 275, (48), 37651-6.
- 604 66. Köpke, M.; Straub, M.; Dürre, P., *Clostridium difficile* is an autotrophic bacterial  
605 pathogen. *PLoS One* **2013**, 8, (4), e62157.
- 606 67. Russell, M. J.; Martin, W., The rocky roots of the acetyl-CoA pathway. *Trends Biochem*  
607 *Sci* **2004**, 29, (7), 358-63.

- 608 68. Aboulnaga el, H.; Pinkenburg, O.; Schiffels, J.; El-Refai, A.; Buckel, W.; Selmer, T.,  
609 Effect of an oxygen-tolerant bifurcating butyryl coenzyme A dehydrogenase/electron-  
610 transferring flavoprotein complex from *Clostridium difficile* on butyrate production in  
611 *Escherichia coli*. *J Bacteriol* **2013**, 195, (16), 3704-13.
- 612 69. Buckel, W., Special clostridial enzymes and fermentation pathways. In *Handbook on*  
613 *Clostridia* 1ed.; Dürre, P., Ed. CRC Press: Taylor & Francis Group 6000 Broken Sound Parkway  
614 NW Boca Raton, FL 33487-2742, 2005; pp 226-283.
- 615 70. Calusinska, M.; Happe, T.; Joris, B.; Wilmotte, A., The surprising diversity of clostridial  
616 hydrogenases: a comparative genomic perspective. *Microbiology* **2010**, 156, (Pt 6), 1575-88.
- 617 71. Schut, G. J.; Adams, M. W., The iron-hydrogenase of *Thermotoga maritima* utilizes  
618 ferredoxin and NADH synergistically: a new perspective on anaerobic hydrogen production. *J*  
619 *Bacteriol* **2009**, 191, (13), 4451-7.
- 620 72. Cammack, R., Hydrogenase sophistication. *Nature* **1999**, 397, (6716), 214-5.
- 621 73. Florin, L.; Tsokoglou, A.; Happe, T., A novel type of iron hydrogenase in the green alga  
622 *Scenedesmus obliquus* is linked to the photosynthetic electron transport chain. *J Biol Chem* **2001**,  
623 276, (9), 6125-32.
- 624 74. Coullon, H.; Rifflet, A.; Wheeler, R.; Janoir, C.; Boneca, I. G.; Candela, T., N-  
625 Deacetylases required for muramic-delta-lactam production are involved in *Clostridium difficile*  
626 sporulation, germination, and heat resistance. *J Biol Chem* **2018**, 293, (47), 18040-18054.
- 627 75. Traag, B. A.; Pugliese, A.; Eisen, J. A.; Losick, R., Gene conservation among endospore-  
628 forming bacteria reveals additional sporulation genes in *Bacillus subtilis*. *J Bacteriol* **2013**, 195,  
629 (2), 253-60.

630

631 **Figures and Tables**

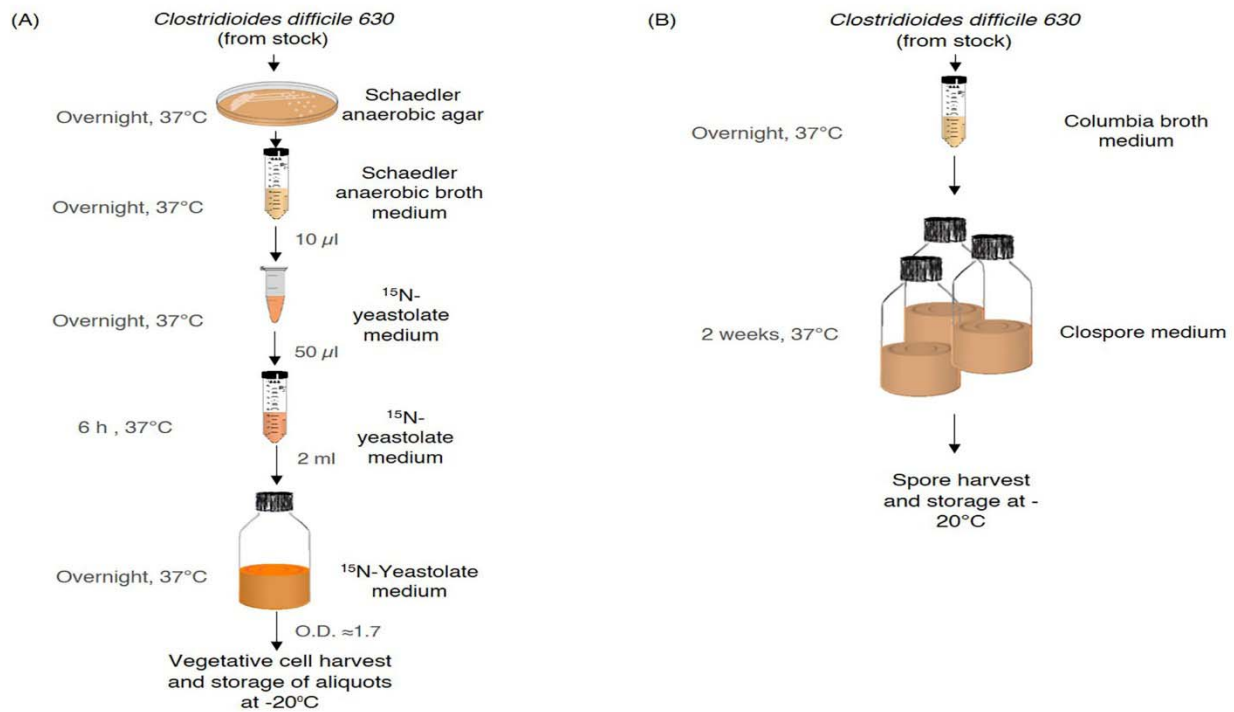

632

633 **Figure 1. Preparation workflow of (A) <sup>15</sup>N-labelled vegetative cells and (B) <sup>14</sup>N spores of**

634 *Clostridioides difficile* 630. See the Materials and Methods section for more details. The images

635 for petri dish (<http://www.clker.com/clipart-red-petri-dish-3.html>), media bottle

636 (<http://www.clker.com/clipart-reagent-bottle-with-growth-media.html>), the Eppendorf tube

637 ([https://www.clipartmax.com/middle/m2i8H7m2A0G6N4G6\\_isop-eppi-pellet-zymo-clip-art-at-clker-eppendorf-tube/](https://www.clipartmax.com/middle/m2i8H7m2A0G6N4G6_isop-eppi-pellet-zymo-clip-art-at-clker-eppendorf-tube/)) and 50 ml tube

638 (<https://openclipart.org/detail/170165/50ml-centrifuge-tube>) are obtained from copyright-free public domain websites and further modified using

639 [tube](#)) are obtained from copyright-free public domain websites and further modified using

640 Microsoft Power Point 2016.

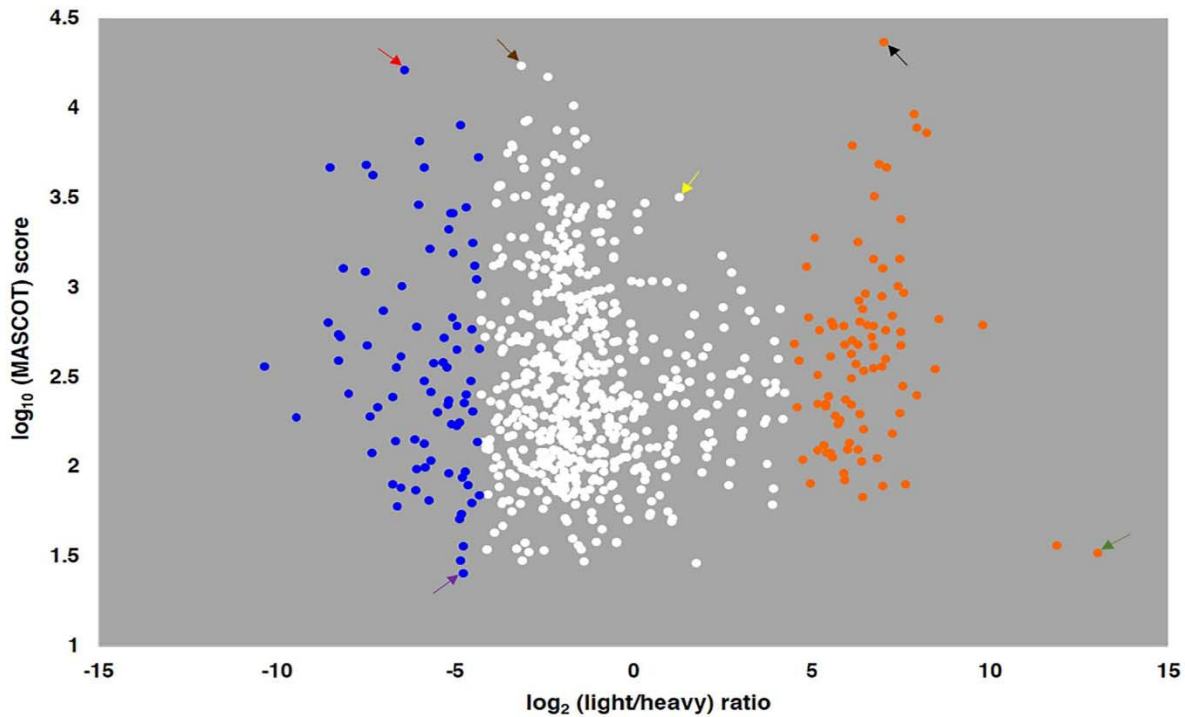

641

642 **Figure 2. Distribution of proteins in *Clostridioides difficile* 630 spores and vegetative cells.**

643 MASCOT score indicates the combined spore and cell abundance of a protein versus its

644 light/heavy protein isotopic ratio, which represents the relative level of the protein in spores over

645 vegetative cells. The orange dots indicate spore-predominant proteins (light/heavy ratios > 20),

646 blue dots indicate vegetative cell-predominant proteins (light/heavy ratios < 0.05), and white dots

647 indicate proteins common between spores and vegetative cells (20 > light/heavy ratios > 0.05).

648 Black arrow - SspA; green arrow- CD2657; red arrow - SlpA; purple arrow- CD0594; brown

649 arrow - CD0825; and yellow arrow - CD0718. (See the text and **Table S1** for more details).

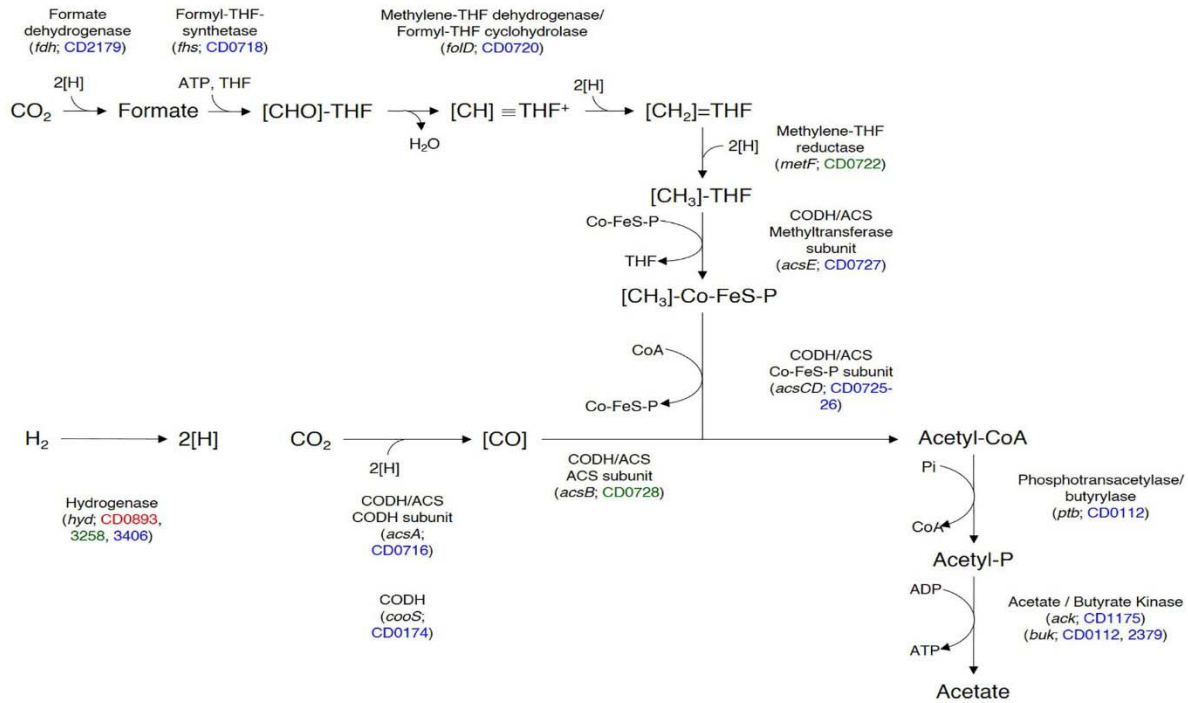

650

651 **Figure 3. Classification of proteins associated with the Wood-Ljungdahl pathway identified**

652 **in *Clostridioides difficile* 630.** Proteins presented in red, green, and blue fall under the categories

653 of vegetative cell-predominant, spore-predominant, and shared proteins, respectively.

654

655

656

657

658

659

660

661

662

663 **Table 1. Uniprot keywords annotation enrichment of quantified *Clostridioides difficile* 630**  
 664 **spore- and vegetative cell proteins based on DAVID functional annotation analysis.**

| UniProt Keyword <sup>a</sup> | No. of proteins |                          |                 |
|------------------------------|-----------------|--------------------------|-----------------|
|                              | Spore proteome  | Vegetative cell proteome | Commonly shared |
| Aminotransferase             |                 | 10                       |                 |
| Arginine biosynthesis        |                 | 7                        |                 |
| Cell shape                   |                 | 8                        |                 |
| Elongation factor            |                 | 5                        |                 |
| Peptidoglycan synthesis      |                 | 7                        |                 |
| Cytoplasm                    | 130             | 136                      | 127             |
| Transferase                  | 115             | 121                      | 110             |
| Nucleotide-binding           | 107             | 114                      | 105             |
| Hydrolase                    | 107             | 104                      | 94              |
| ATP-binding                  | 89              | 95                       | 87              |
| Metal-binding                | 82              | 80                       | 78              |
| Oxidoreductase               | 61              | 65                       | 54              |
| Ribonucleoprotein            | 48              | 48                       | 48              |
| RNA-binding                  | 49              | 48                       | 48              |
| Ligase                       | 46              | 48                       | 46              |
| Ribosomal protein            | 47              | 47                       | 47              |
| Protein biosynthesis         | 34              | 36                       | 34              |
| Lyase                        | 31              | 36                       | 28              |



|                           |    |    |    |
|---------------------------|----|----|----|
| Magnesium                 | 33 | 33 | 33 |
| rRNA-binding              | 32 | 32 | 32 |
| Zinc                      | 30 | 28 | 28 |
| Amino-acid biosynthesis   | 22 | 27 | 22 |
| Isomerase                 | 25 | 26 | 24 |
| Aminoacyl-tRNA synthetase | 23 | 24 | 23 |
| Protease                  | 25 | 20 | 20 |
| GTP-binding               | 15 | 16 | 15 |
| Pyridoxal phosphate       | 13 | 14 | 12 |
| Glycosyltransferase       | 14 | 13 | 13 |
| Cell cycle                | 11 | 13 | 11 |
| Cell division             | 11 | 13 | 11 |
| Flavoprotein              | 14 | 12 | 11 |
| FAD                       | 11 | 10 | 9  |
| NADP                      | 11 | 12 | 11 |
| tRNA-binding              | 11 | 11 | 11 |
| NAD                       | 12 | 11 | 10 |
| Ion transport             | 10 | 11 | 10 |
| Pyruvate                  | 11 | 11 | 11 |
| Chaperone                 | 10 | 10 | 10 |
| Manganese                 | 10 | 9  | 9  |
| ATP synthesis             | 9  | 9  | 9  |
| Aminopeptidase            | 9  | 9  | 9  |

|                              |    |   |   |
|------------------------------|----|---|---|
| Lysine biosynthesis          | 8  | 8 | 8 |
| Hydrogen ion transport       | 8  | 8 | 8 |
| Glycolysis                   | 8  | 7 | 7 |
| Stress response              | 7  | 7 | 7 |
| Diaminopimelate biosynthesis | 6  | 6 | 6 |
| Pyrimidine biosynthesis      | 6  | 6 | 6 |
| CF(1)                        | 5  | 5 | 5 |
| One-carbon metabolism        | 5  | 5 | 5 |
| DNA-directed RNA polymerase  | 4  | 4 | 4 |
| Methionine biosynthesis      | 4  | 4 | 4 |
| Virion                       | 10 |   |   |
| Capsid protein               | 9  |   |   |
| Rotamase                     | 5  |   |   |
| Metalloprotease              | 6  |   |   |

---

665 <sup>a</sup> EASE score i.e. *p*-value threshold for the keyword annotation enrichment was set to 0.05

666

667

668

669

670

671

672

673

674 **Supporting Information**

675 **Supplementary Figure S1. Cellular overview of quantified proteins from spores and**  
676 **vegetative cells of *Clostridioides difficile* 630.** The quantified proteins that are spore-  
677 predominant (red), commonly shared but still higher in spores (purple), commonly shared but  
678 higher in cells (orange) and cell-predominant proteins (green) are represented with the pathways  
679 to which they belong. Refer to **Supplementary Table S1** for the details.

680

681 **Supplementary Table S1. Proteins identified and quantified from *Clostridioides difficile* 630**  
682 **vegetative cells and spores.** Score (AA): Arithmetic average of Mascot scores from three  
683 replicates; SEM (AA): Standard Error of Means of arithmetic averages; L/H (GM): Geometric  
684 means of Light/Heavy ratios from three replicates; SEM (AA): Standard error of means in  
685 arithmetic averages of Light/Heavy ratios; SD (GM): Geometric standard deviation in  
686 Light/Heavy ratios; Proteins identified only in a single replicate are shown in red; Proteins  
687 encoded by essential genes are shown in blue.

688

689 **Supplementary Table S2. Predicted membrane proteins from *Clostridioides difficile* 630**  
690 **vegetative cells and spores.** All the default parameters were used for TMHMM predictions.

691

692

693

694

695

696

697 Abstract graphic For Table of Contents Only

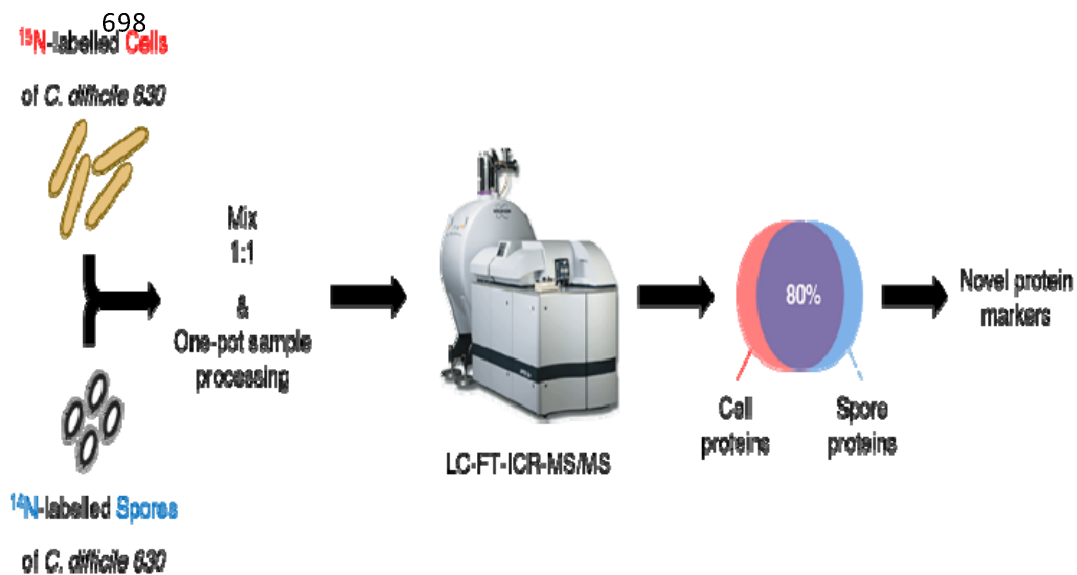

**Vegetative Cell and Spore Proteomes of *Clostridioides difficile* show finite differences and reveal potential protein markers.**

Wishwas R. Abhyankar<sup>1,2</sup>, Linli Zheng<sup>1,2</sup>, Stanley Brul<sup>1</sup>, Chris G. de Koster<sup>2</sup>, Leo J. de Koning<sup>2</sup>

<sup>1</sup>Department of Molecular Biology and Microbial Food Safety, University of Amsterdam, Amsterdam, the Netherlands;

<sup>2</sup>Department of Mass Spectrometry of Bio-Macromolecules, University of Amsterdam, Amsterdam, the Netherlands.

**Supplemental Material**

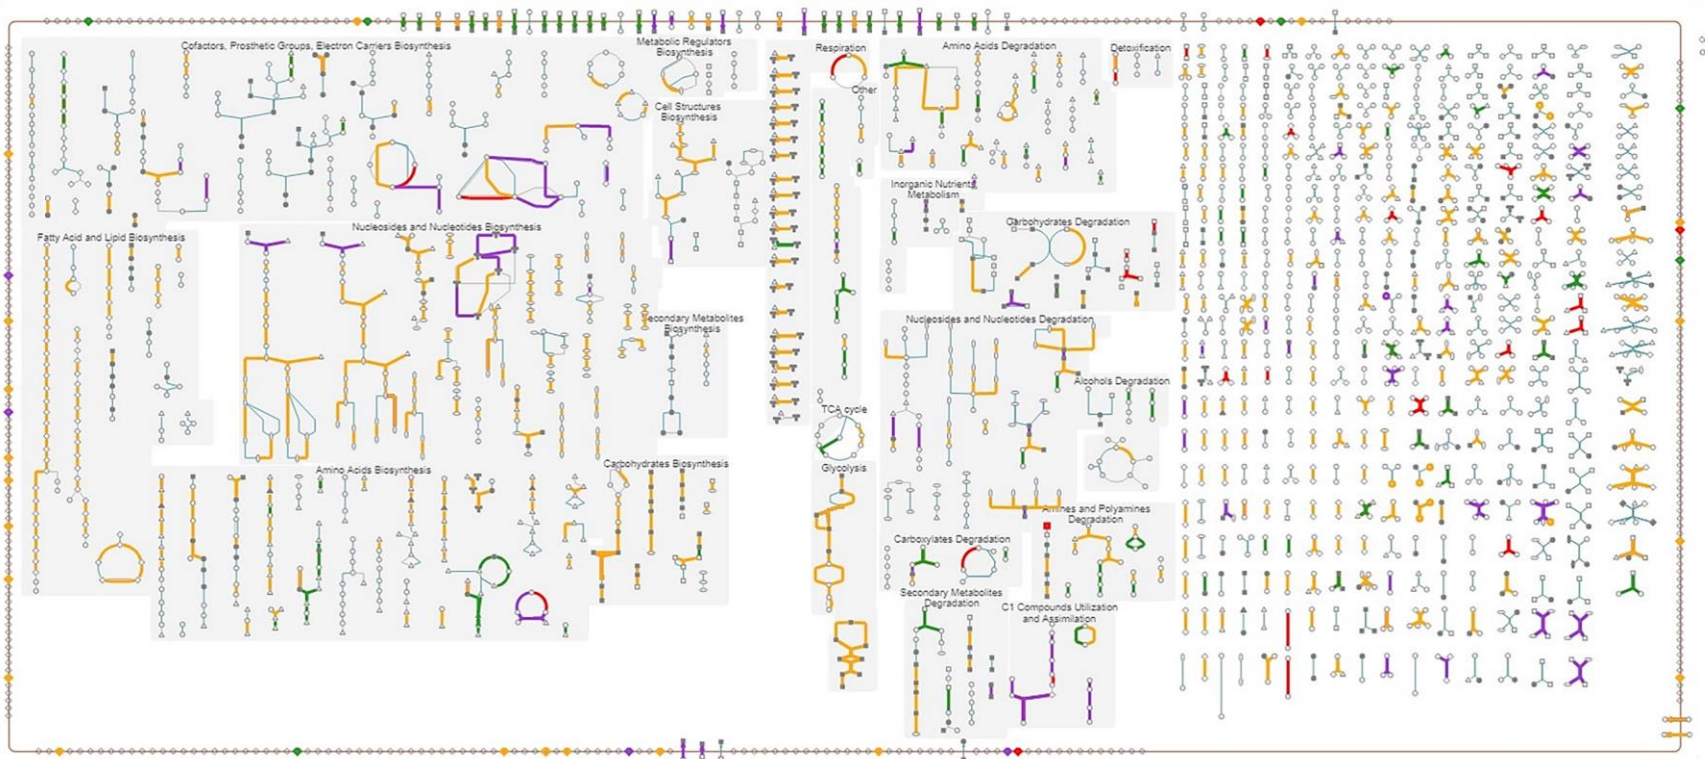

**Supplementary Figure S1. Cellular overview of quantified proteins from spores and vegetative cells of *Clostridioides difficile* 630.** The overview was generated using the BioCyc pathway analysis tool. The quantified proteins that are spore-predominant (red), commonly shared but still higher in spores (purple), commonly shared but higher in cells (orange) and cell-predominant proteins (green) are represented with the pathways to which they belong. Refer to **Supplementary Table S1** for the details.
